# Supplementary material
Source: PubMed Central journal article supplement (PMC4369313)

**A**

| All common genes (655)                                                       |            |         | Flk1 <sup>+</sup> MES specific genes (2300)                                            |            |         | HPC7 specific genes (3158)                                 |            |         | FL erythroblast specific genes (976)                   |            |         |
|------------------------------------------------------------------------------|------------|---------|----------------------------------------------------------------------------------------|------------|---------|------------------------------------------------------------|------------|---------|--------------------------------------------------------|------------|---------|
| GO Term                                                                      | Gene count | P-value | GO Term                                                                                | Gene count | P-value | GO Term                                                    | Gene count | P-value | GO Term                                                | Gene count | P-value |
| Protein amino acid phosphorylation                                           | 49         | 6.2E-8  | Cell adhesion                                                                          | 105        | 3.0E-8  | Translation                                                | 103        | 2.5E-15 | Nucleosome assembly                                    | 15         | 5.4E-6  |
| Intracellular signaling cascade                                              | 62         | 6.7E-8  | Biological adhesion                                                                    | 105        | 3.3E-8  | RNA processing                                             | 115        | 2.1E-10 | Chromatin assembly                                     | 15         | 7.5E-6  |
| Phosphorylation                                                              | 49         | 1.8E-6  | Positive reg. of nitrogen compound metabolic process                                   | 99         | 5.9E-8  | Apoptosis                                                  | 115        | 1.0E-8  | Protein-DNA complex assembly                           | 15         | 8.8E-6  |
| Phosphate metabolic process                                                  | 54         | 6.9E-6  | Positive reg. of nucleobase, nucleoside, nucleotide and nucleic acid metabolic process | 96         | 9.6E-8  | Programmed cell death                                      | 115        | 2.8E-8  | Nucleosome organization                                | 15         | 8.8E-6  |
| Phosphorous metabolic process                                                | 54         | 6.9E-6  | Reg. of transcription from RNA polymerase II promoter                                  | 109        | 3.1E-7  | Cell death                                                 | 120        | 6.7E-8  | DNA packaging                                          | 17         | 1.5E-5  |
| Positive regulation of cell proliferation                                    | 23         | 1.6E-4  | Positive reg. of RNA metabolic process                                                 | 81         | 3.5E-7  | Protein catabolic process                                  | 128        | 1.2E-7  | Cellular macromolecular complex assembly               | 25         | 7.0E-5  |
| Regulation of cell proliferation                                             | 34         | 3.8E-4  | Positive reg. of transcription, DNA-dependent                                          | 80         | 5.2E-7  | Death                                                      | 121        | 1.4E-7  | Macromolecular complex assembly                        | 33         | 1.0E-4  |
| Hemopoiesis                                                                  | 20         | 6.0E-4  | Positive reg. of gene expression                                                       | 89         | 1.2E-6  | Cellular macromolecule catabolic process                   | 136        | 3.1E-7  | Porphyrin metabolic process                            | 8          | 1.3E-4  |
| Activation of protein kinase activity                                        | 8          | 0.0012  | Positive reg. of transcription                                                         | 88         | 7.0E-7  | Macromolecule catabolic process                            | 144        | 3.3E-7  | Tetraynole metabolic process                           | 9          | 1.3E-4  |
| Regulation of myeloid cell differentiation                                   | 8          | 0.0012  | Positive reg. of macromolecule biosynthetic process                                    | 95         | 1.1E-6  | RNA splicing                                               | 58         | 3.9E-7  | Chromatin assembly or disassembly                      | 16         | 1.5E-4  |
| Regulation of small GTPase mediated signal transduction                      | 18         | 0.0013  | Positive reg. of gene expression                                                       | 89         | 1.2E-6  | Cellular protein catabolic process                         | 121        | 9.3E-7  | Cellular macromolecular complex subunit organization   | 26         | 1.9E-4  |
| Protein kinase cascade                                                       | 18         | 0.0019  | Positive reg. of macromolecule metabolic process                                       | 109        | 1.2E-6  | mRNA metabolic process                                     | 57         | 1.1E-6  | Macromolecular complex subunit organization            | 33         | 4.6E-4  |
| Hemopoietic or lymphoid organ development                                    | 20         | 0.0022  | Tube development                                                                       | 56         | 1.6E-6  | Proteolysis involved in cellular protein catabolic process | 120        | 1.2E-6  | Protein catabolic process                              | 43         | 0.001   |
| Positive regulation of molecular function                                    | 21         | 0.0026  | Positive reg. of biosynthetic process                                                  | 98         | 1.7E-6  | mRNA metabolic process                                     | 76         | 2.0E-6  | Heme metabolic process                                 | 6          | 0.001   |
| Programmed cell death                                                        | 28         | 0.0035  | Positive reg. of cellular biosynthetic process                                         | 97         | 2.1E-6  | mRNA processing                                            | 68         | 2.4E-6  | Macromolecule catabolic process                        | 48         | 0.002   |
| Immune system development                                                    | 6          | 0.0038  | Positive reg. of transcription from RNA polymerase II promoter                         | 69         | 3.2E-6  | Modification-dependent macromolecule catabolic process     | 112        | 7.1E-6  | Chromosome organization                                | 33         | 0.002   |
| Induction of apoptosis by intracellular signals                              | 6          | 0.0053  | Positive regulation of DNA binding                                                     | 17         | 3.9E-6  | Protein localization                                       | 154        | 1.1E-5  | Response to metal ion                                  | 9          | 0.0029  |
| Positive regulation of catalytic activity                                    | 18         | 0.0055  | Metal ion transport                                                                    | 80         | 5.9E-6  | Cell cycle                                                 | 128        | 2.1E-5  | Chromatin organization                                 | 27         | 0.0033  |
| DNA damage response, signal transduction resulting in induction of apoptosis | 5          | 0.0061  | Heart development                                                                      | 48         | 6.5E-6  | Negative reg. of cyclin-dependent protein kinase activity  | 8          | 4.0E-5  | Cellular protein catabolic process                     | 39         | 0.0065  |
| Death                                                                        | 29         | 0.0066  | Positive regulation of binding                                                         | 17         | 1.1E-5  | Ribonucleoprotein complex biogenesis                       | 39         | 5.5E-5  | Cellular macromolecule catabolic process               | 43         | 0.0067  |
| Positive regulation of protein kinase activity                               | 11         | 0.0074  | Cell motion                                                                            | 68         | 1.4E-5  | Regulation of apoptosis                                    | 115        | 7.9E-5  | Sphingolipid metabolic process                         | 9          | 0.0076  |
|                                                                              |            |         |                                                                                        |            |         |                                                            |            |         | Modification-dependent macromolecule catabolic process | 37         | 0.0077  |

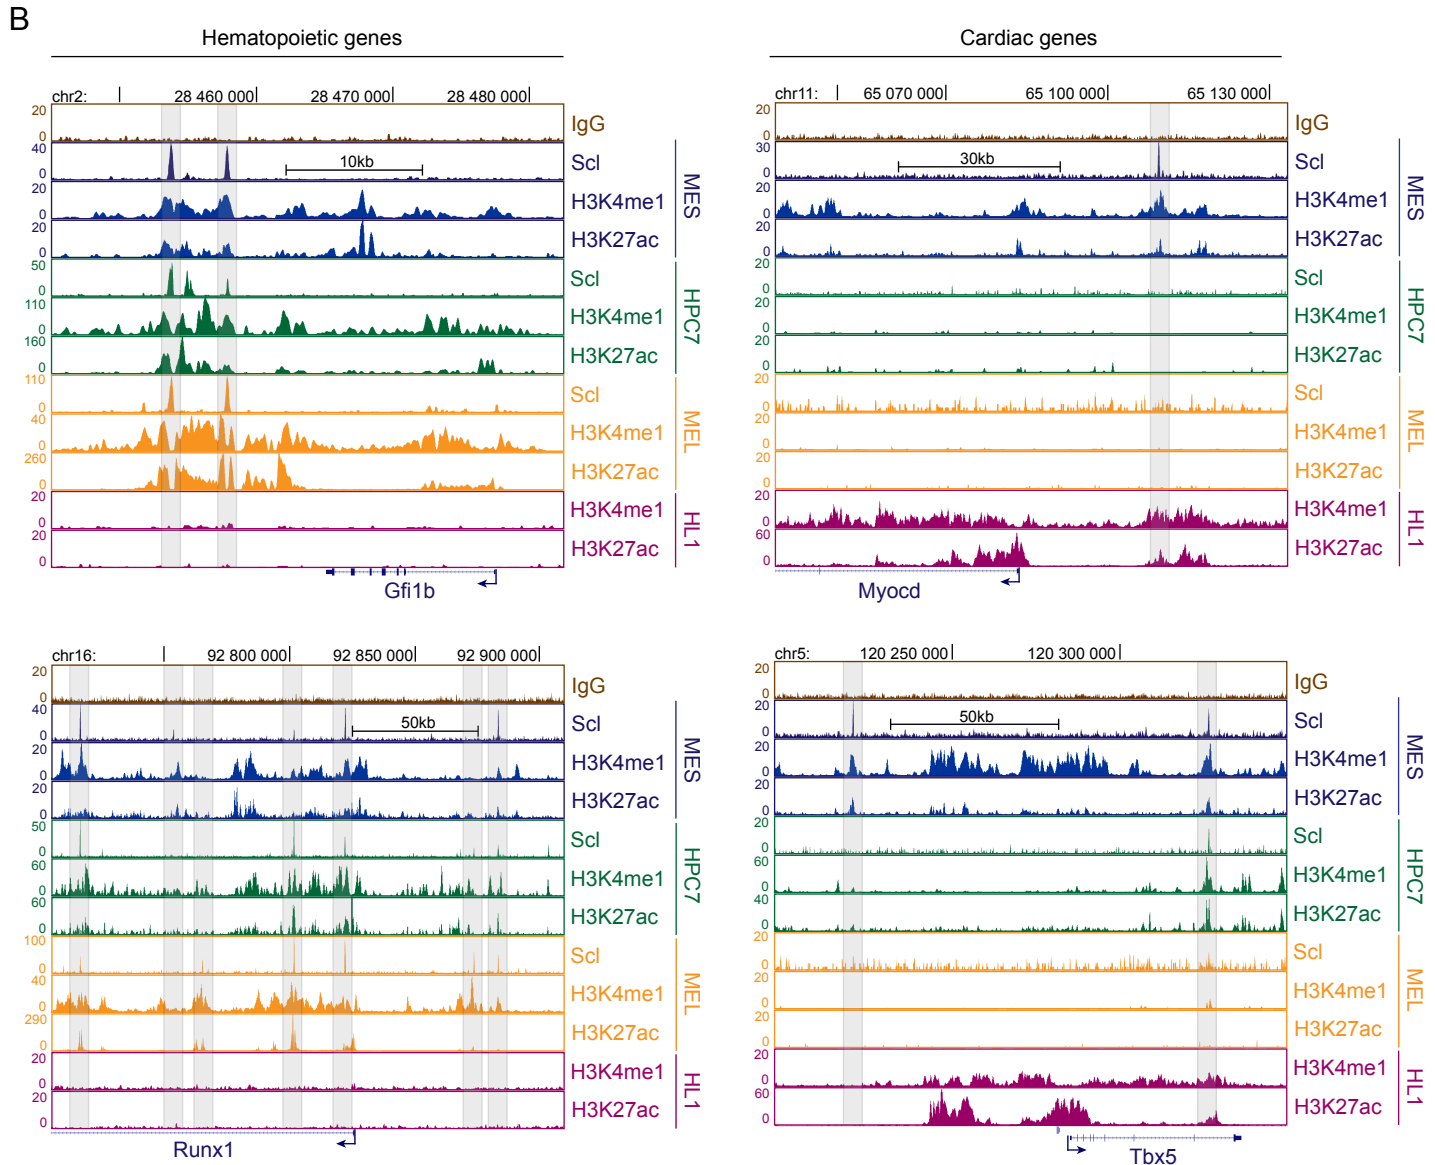

Supplement: embj0034-0759-sd3.pdf [file embj0034-0759-sd3.pdf]
