# Supplementary material
Source: PubMed Central journal article supplement (PMC4369313)

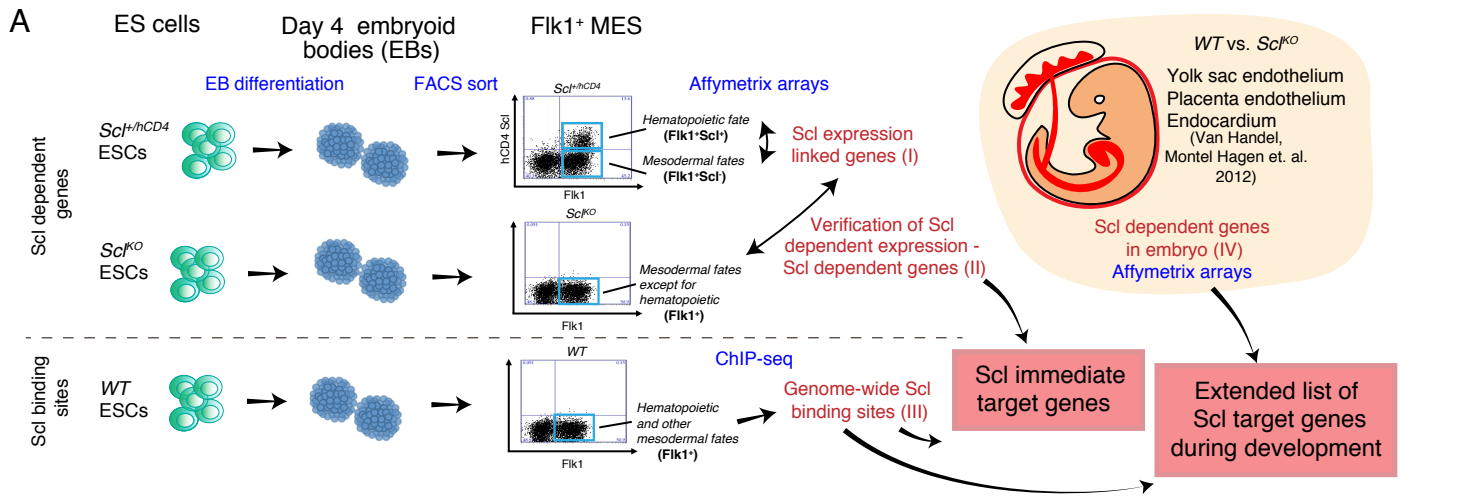

**B** Scl dependent genes in Fik1<sup>+</sup> MES

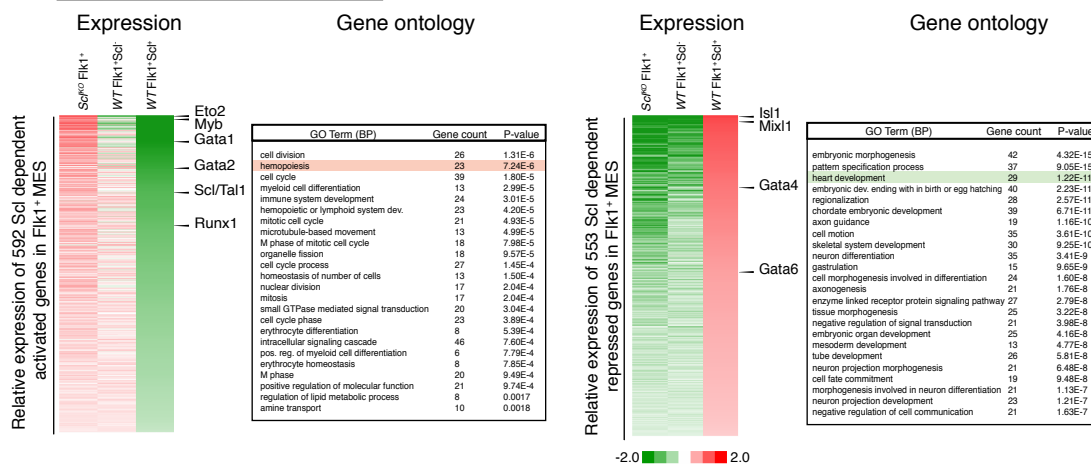

**C** Enriched terms among Scl binding associated genes in Fik1<sup>+</sup> MES

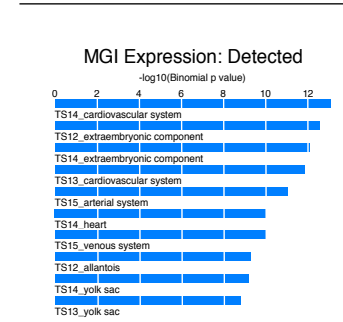

**D** day 7 EB

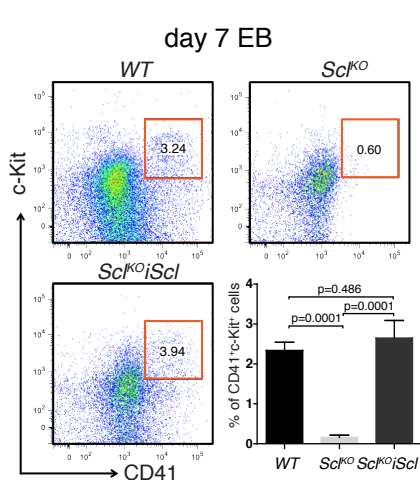

**E** Developmental potential of day 4.75 CD41<sup>+</sup>CD31<sup>+</sup>Tie2<sup>+</sup> endothelial cells

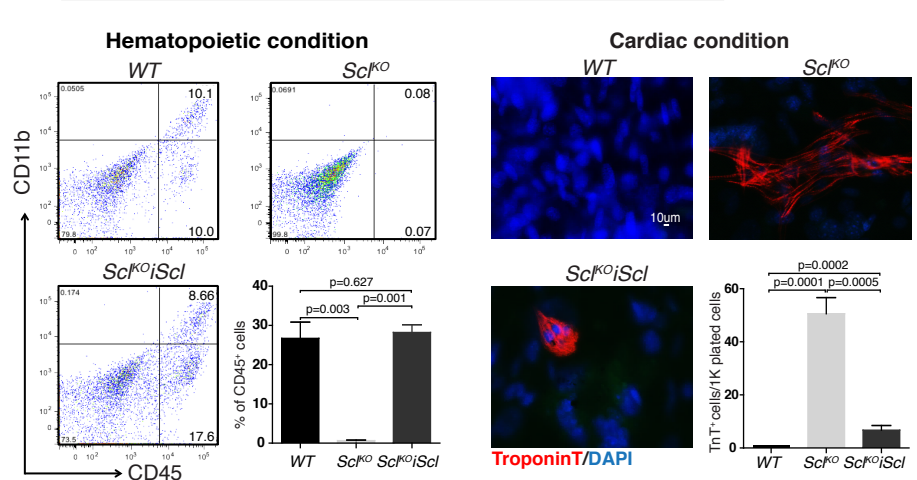

**F** Day 4.75 CD41<sup>+</sup>CD31<sup>+</sup>Tie2<sup>+</sup> endothelial cell gene expression

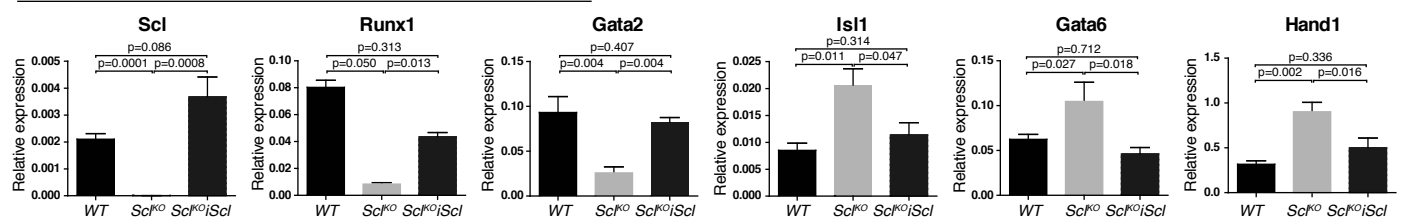

Supplement: embj0034-0759-sd1.pdf [file embj0034-0759-sd1.pdf]
