# Supplementary material
Source: PubMed Central journal article supplement (PMC4369313)

H3K4me1 and Scl enrichment at Scl peaks in *Sc<sup>KO</sup>iScI* ES, ES cells; *WT* and *Sc<sup>KO</sup>* MES

■ Scl MES binding  
■ ectopic Scl binding

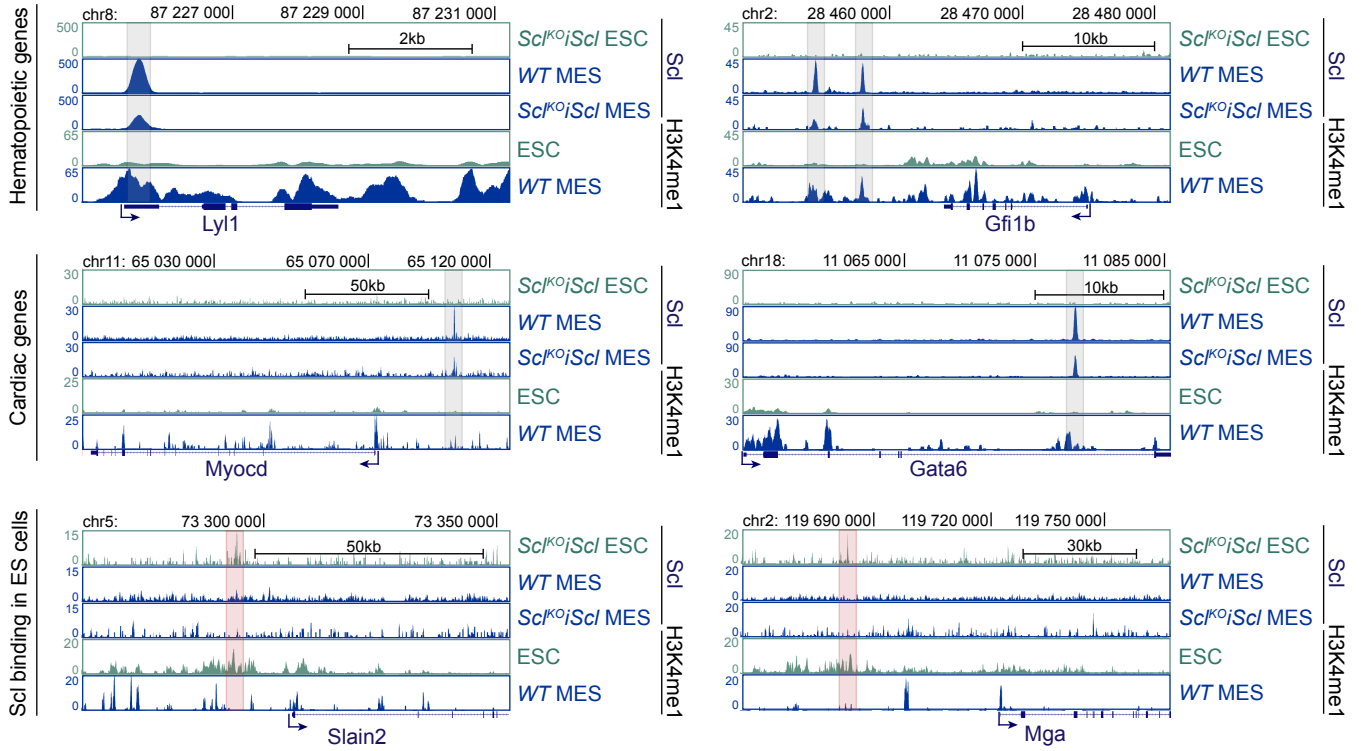

Supplement: embj0034-0759-sd2.pdf [file embj0034-0759-sd2.pdf]
