# Supplementary material
Source: PubMed Central journal article supplement (PMC4369313)

**A** Scl MES binding sites overlap with Gata4 binding sites in Flk1<sup>+</sup>MES and E12.5 Hearts

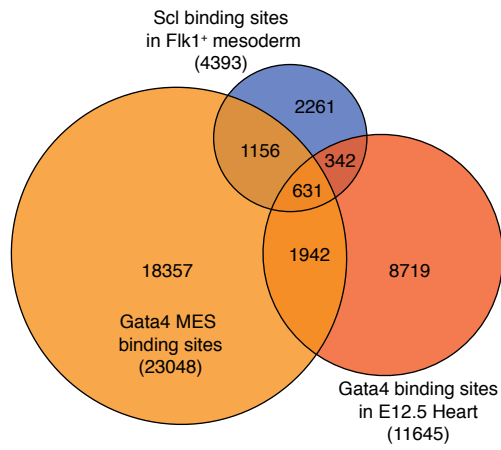

**B** Scl MES binding sites overlap with Gata4 binding sites in Adult and E12.5 Hearts

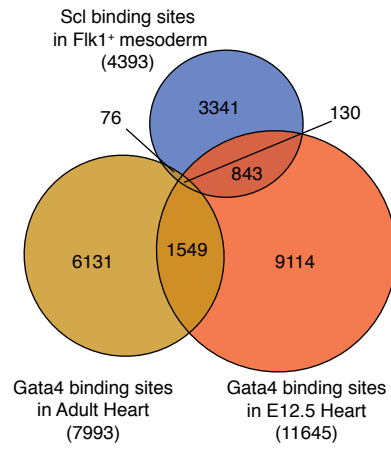

**C** Hematopoietic genes

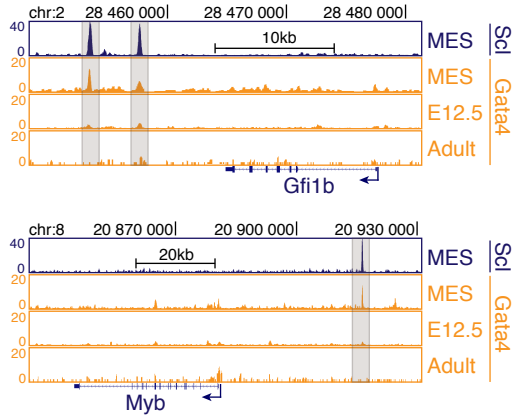

Cardiac genes

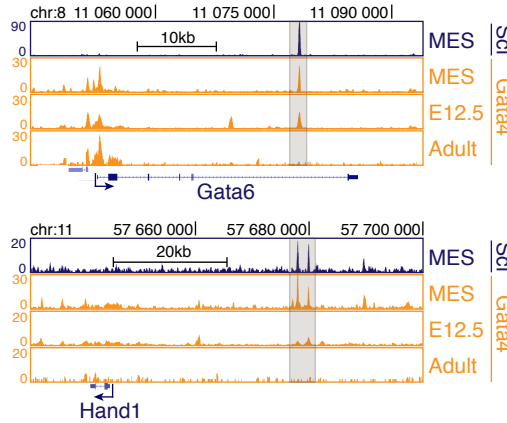

**D** Gata2 ChIP in day 4 WT Flk1<sup>+</sup> MES

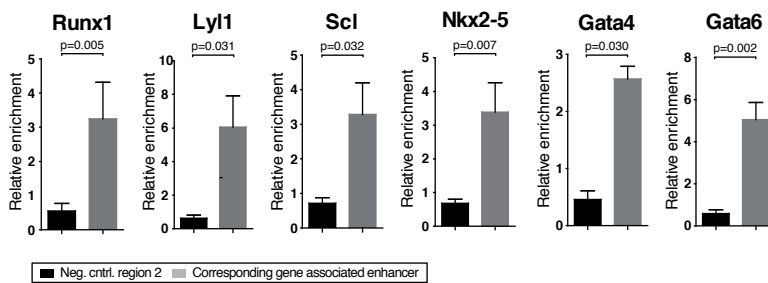

Supplement: embj0034-0759-sd5.pdf [file embj0034-0759-sd5.pdf]
