# Supplementary material
Source: PubMed Central journal article supplement (PMC4369313)

**A**

Scl ChIP PCR in day 4 Flk1<sup>+</sup> EB cells

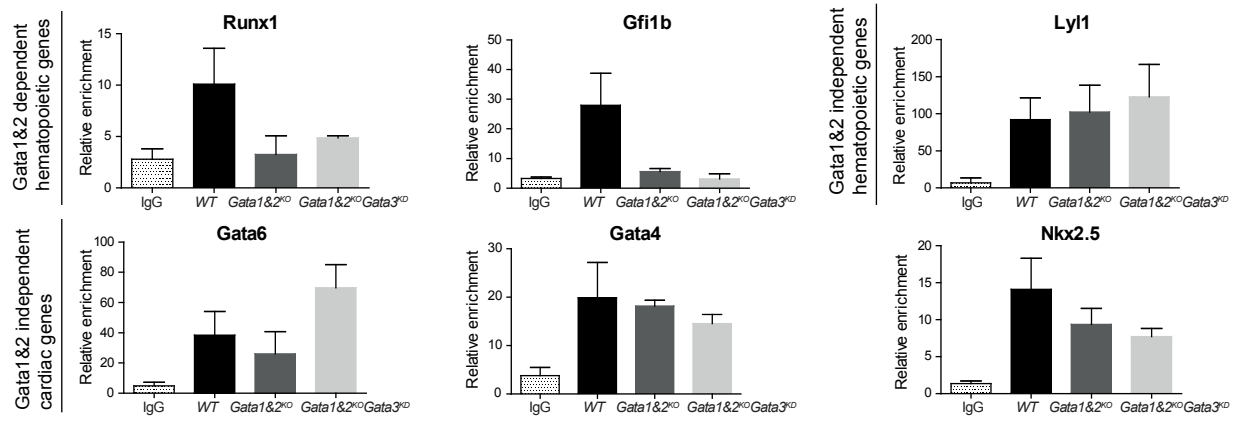

**B**

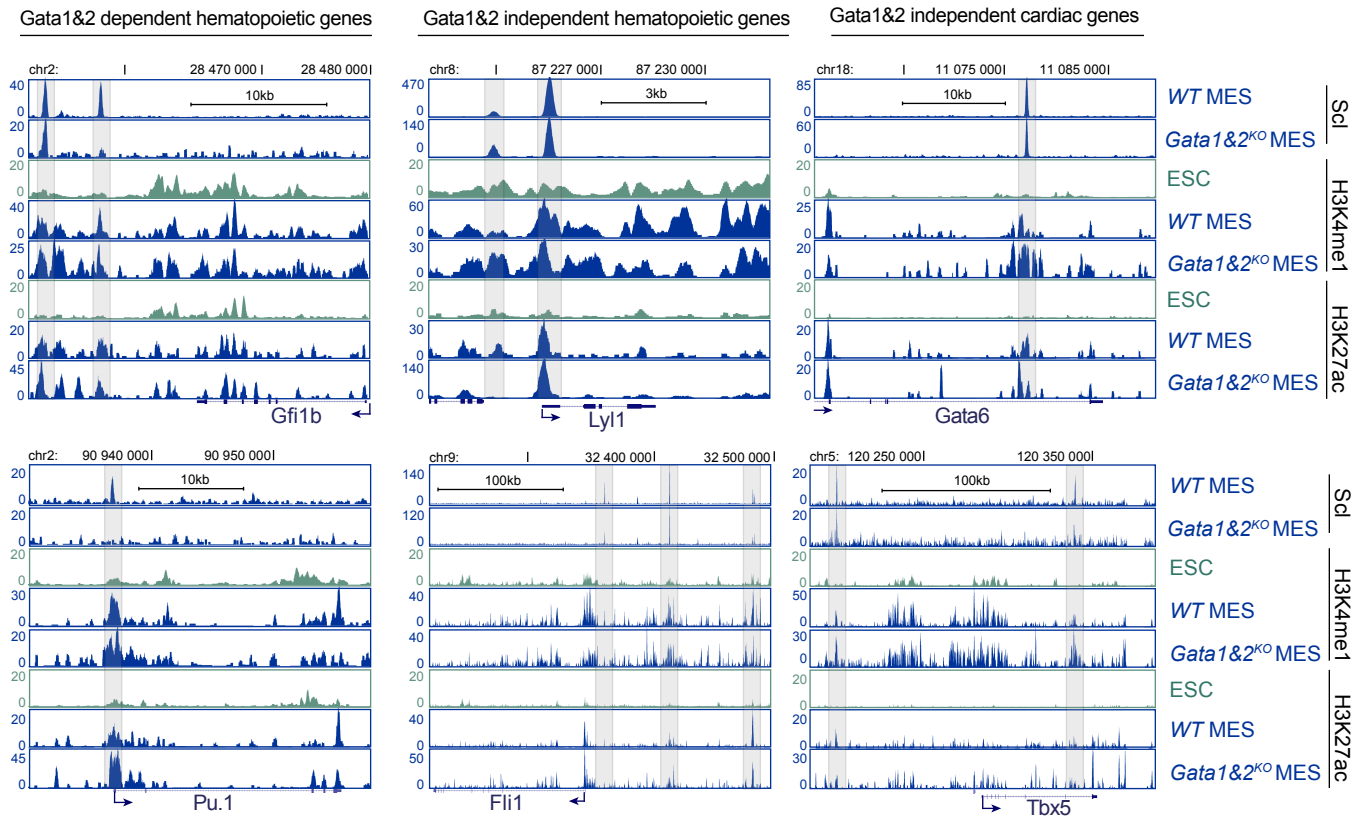

**C**

Genome-wide histone modification enrichment correlations

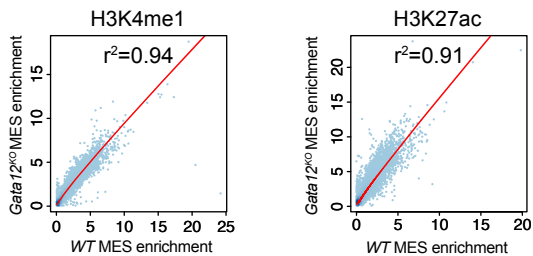

Supplement: embj0034-0759-sd7.pdf [file embj0034-0759-sd7.pdf]
